# The association of pretreatment thrombocytosis with prognosis and clinicopathological significance in cervical cancer: a systematic review and meta-analysis

Juan Cheng<sup>1,\*</sup>, Zhi Zeng<sup>3,\*</sup>, Qingjian Ye<sup>1,\*</sup>, Yu Zhang<sup>1</sup>, Ronghua Yan<sup>2</sup>, Changyan Liang<sup>1</sup>, Jia Wang<sup>1</sup>, Mengxiong Li<sup>1,\*</sup>, Mixuan Yi<sup>4</sup>

<sup>1</sup>Department of Gynecology, The Third Affiliated Hospital of Sun Yat-sen University, Guangzhou 510630, Guangdong Province, P.R. China

<sup>2</sup>Department of Radiology, The Third Affiliated Hospital of Sun Yat-sen University, Guangzhou 510630, Guangdong Province, P.R. China

<sup>3</sup>Reproductive Medicine Center, The Sixth Affiliated Hospital of Sun Yat-sen University, Guangzhou 510655, Guangdong Province, P.R. China

<sup>4</sup>Department of nephrology, The Second Xiangya Hospital, Central South University, Changsha 410001, Hunan Province, P.R. China

\*These authors contributed equally to this work

**Correspondence to:** Mengxiong Li, **email:** limengxiong496@163.com  
Mixuan Yi, **email:** 742976265@qq.com

**Keywords:** *inflammation, thrombocytosis, cervical cancer, prognosis, meta-analysis*

**Received:** July 05, 2016

**Accepted:** November 14, 2016

**Published:** February 15, 2017

**Copyright:** Cheng et al. This is an open-access article distributed under the terms of the Creative Commons Attribution License (CC-BY), which permits unrestricted use, distribution, and reproduction in any medium, provided the original author and source are credited.

## ABSTRACT

Previous studies reported inconsistent findings about the relationship between pretreatment thrombocytosis and survival in patients with cervical cancer. This study aimed to evaluate the prognostic significance of thrombocytosis in cervical cancer. We searched databases to identify relevant articles. Pooled hazard ratios (HRs), odds ratios (ORs), and 95% confidence intervals (CIs) were calculated. Fourteen studies including 3,394 patients were eligible for the meta-analysis. Overall, an elevated platelet count was significantly associated with inferior overall survival (OS, hazard ratio [HR]: 1.66, 95% confidence interval [CI]: 1.42–1.95,  $P < 0.001$ ) and recurrence-free survival (RFS, HR: 1.67, 95% CI: 1.15–2.42,  $P = 0.007$ ) but not progression-free survival (PFS, HR: 1.21, 95% CI: 0.89–1.64;  $P = 0.235$ ). The results were similar for low stage patients treated with surgery alone. Moreover, a pretreatment thrombocytosis status was significantly associated with higher clinical stage (odd ratio [OR]: 2.39, 95% CI: 1.68–3.38,  $P < 0.001$ ), positive pelvic node status (OR: 1.58, 95% CI: 1.01–2.45,  $P = 0.044$ ) and larger tumor size (OR: 2.32, 95% CI: 1.39–3.87,  $P = 0.001$ ). Pretreatment thrombocytosis is an independent prognosis predictor in cervical cancer patients. It may be used as a readily available biomarker to refine clinical outcome prediction for cervical cancer patients.

## INTRODUCTION

Cervical cancer is the third most normally diagnosed malignance and the fourth leading cause of cancer relevant mortality in females worldwide, with 85% of cases occurring in developing countries, and the peak incidence is in the 40–45 year age group [1]. Recently, more and more patients presenting with early stage disease is hypothesized to be the result of the increasingly widespread utilization of multi-parametric imaging, which has lead to an increase in

the early detection of cervical malignance. Conventionally, radical surgery has been the mainstay treatment of early stage cervical cancer, yielding a relatively favorable prognosis [2]. However, the oncological outcome of advanced or recurrent cervical cancer remains very poor [3]. Hence, it is very important to identify prognostic factors which can be applied to predict treatment outcomes, because such predictors are helpful in guiding clinical management with respect to choosing therapy, generating suitable protocols for follow-up, and determining trial eligibility criteria. Although

numerous tumor markers have been evaluated as potential prognostic predictors, such as tissue polypeptide antigen, squamous cell carcinoma antigen, cancer antigen-125, carcinoembryonic antigen, and cytokeratin fragment 21-1 [4], it is still difficult to estimate the recurrence risk and outcome in patients with cervical cancer.

There is increasing evidence that inflammatory processes in the tumor microenvironment exert a key role during the development of several tumors [5]. As a reflection of systemic inflammatory response, pretreatment thrombocytosis, has been reported by several studies to be associated with inferior prognosis of cervical cancer. However, because of variations in results, a consensus can't be achieved. A meta-analysis published in 2012 reported thrombocytosis could predict inferior survival in cervical cancer patients [6]. Nevertheless, this study only studied overall survival (OS). Additionally, many studies embracing reliable data have been published lately. In order to obtain more detailed results, we updatedly performed a systematic review of literatures that have identified relationships of pretreatment thrombocytosis with survival and clinicopathological features in cervical cancer, and merged the extracted data to conduct a meta-analyses.

## RESULTS

### Included studies

All of the selected studies were nonrandomized. The flow chart of the literature search was presented in Figure 1. In total, 615 relevant records were obtained from the initial literature retrieve in the above databases and no record retrieved from through references. One hundred seventy-nine duplicates were excluded from the initial records. After screening the titles of 436 studies, 75 studies were chosen for examining the abstracts. And the abstracts reviewing process recognized 25 articles, which live up to the inclusion criteria. The remaining articles were reviewed in full, finally, 14 articles were included in extracting data.

All of the included studies were published between 1992 and 2015, which comprised 3,394 patients. They had a retrospective design, with a median sample size of 219 patients (range, 46–643 patients). Most of the studies paid their attention to OS of cervical cancer patients. In 3 studies, the hazard ratio (HR) was adjusted for other relevant variables (covariates) embracing patient age, tumor size, histology, pelvic node status and clinical stage (Table 1).

### Meta-analysis

At first, we studied the survival differences of cervical cancer patients presenting or absented pretreatment thrombocytosis. The association between thrombocytosis and OS was reported in 13 studies enrolling 3,341 patients [7–19]. Six of the eligible studies reported a non-statistically significant hazard ratio, a forest plot of all studies was shown in Figure 2. A combined

analysis showed that pretreatment thrombocytosis was associated with poor OS in cervical cancer (HR: 1.66, 95% CI: 1.42–1.95;  $P < 0.001$ ). And there was absence of evidence for inter-study heterogeneity ( $I^2 = 24.5%$ ,  $P = 0.196$ ). Four studies comprising 499 patients covered hazard ratios for RFS [7, 12, 13, 15], the meta-analysis found that pretreatment thrombocytosis was associated with poor RFS in cervical cancer (HR: 1.67, 95% CI: 1.15–2.42;  $P = 0.007$ ) (Figure 3). And there was absence of evidence for inter-study heterogeneity ( $I^2 = 38.2%$ ,  $P = 0.183$ ). Four studies comprising 1,025 patients reported hazard ratios for PFS [8, 10, 18, 20], meta-analyses were performed and found that the associations of pretreatment thrombocytosis with PFS (HR: 1.21, 95% CI: 0.89–1.64;  $P = 0.235$ ) were not statistical significant (Figure 4).

Table 2 shows subgroup analyses by publication year, population, number of subjects, value of cutoff and source of HR. When stratified by these variables, there were no significant differences in pooled HRs for OS, and pretreatment thrombocytosis remained to be a significant predictor for OS.

Four studies reported the prognostic significance of pretreatment thrombocytosis in early stage patients treated with surgery alone [7, 15, 16, 18]. A forest plot of these studies was shown in Figure 5. A combined analysis showed that pretreatment thrombocytosis was associated with inferior OS (HR: 2.02, 95% CI: 1.42–2.88;  $P < 0.001$ ) and RFS (HR: 2.08, 95% CI: 1.22–3.54;  $P = 0.007$ ) but not PFS (HR: 1.54, 95% CI: 0.80–2.96;  $P = 0.196$ ) for these patients.

We then studied the relationships between thrombocytosis and the clinicopathological features of cervical cancer. Six studies provided sufficient data for the meta-analyses. As shown in Table 3, pretreatment thrombocytosis was significantly associated with clinical stage (III/IV versus I/II) (HR: 2.39, 95% CI: 1.68–3.38;  $P < 0.001$ ), pelvic node status (positive versus negative) (HR: 1.58, 95% CI: 1.01–2.45;  $P = 0.044$ ) and tumor size ( $> 4$  versus  $\leq 4$ ) (HR: 2.32, 95% CI: 1.39–3.87;  $P = 0.001$ ). These clinicopathological characteristics are indicative of poor prognosis and disease aggressiveness. We found some inter-study heterogeneity in the pelvic node status and histology ( $I^2 = 51.9%$  and  $78.9%$ , separately), whereas heterogeneity weren't exhibited in the analyses of other clinicopathological parameters ( $I^2 = 0–33.3%$ ).

### Publication bias

Publication bias were evaluated applying the funnel plot, Begg test, and Egger test in the meta-analysis. In the funnel plots, no obvious evidence of asymmetry were revealed in the contrast. Furthermore, the results from the Begg test and Egger test for the studies were  $P_{\text{Begg's}} = 0.308–0.734$  and  $P_{\text{Egger's}} = 0.273–0.368$  (Figure 6). Hence, the evidence above shows a low probability of publication bias. Sensitivity analysis suggested that excluding any single study did not significantly impact the pooled HR or OR.

**Table 1: The main characteristics of enrolled studies**

| Study          | Population   | Study Design | Case number | Clinical stage | Treatment            | Median age, y     | Cut-off/nL | Survival analysis | Source of HR | Adjusted | Median follow-up, mo |
|----------------|--------------|--------------|-------------|----------------|----------------------|-------------------|------------|-------------------|--------------|----------|----------------------|
| Zhao_2015      | China        | R            | 220         | I-IIA          | Surgery              | -                 | 300        | OS, RFS           | SC           | -        | 53 (6–111)           |
| Xiao_2015      | China        | R            | 238         | I-IV           | RT and CT            | 52 (34–70)        | 200        | OS, PFS           | DE           | -        | 42 (15–91)           |
| Kawano_2015    | Japan        | R            | 286         | I-IV           | RT                   | 63.6 <sup>M</sup> | 350        | OS                | Rep          | Yes      | -                    |
| Wang_2012      | China        | R            | 111         | IB2-IIB        | CT or surgery        | 42 (21–68)        | 266        | OS, PFS           | DE           | -        | 44 (13–111)          |
| Biedka_2012    | Poland       | R            | 53          | I-IV           | RT or surgery or CT- | -                 | -          | PFS               | DE           | -        | 10 (2–31)            |
| Qiu_2010       | China        | R            | 318         | I-IV           | -                    | 43                | 400        | OS                | DE           | -        | -                    |
| Gadducci_2010  | Italy        | R            | 46          | IB2-IIB        | CT and Surgery       | 47 (27–70)        | 272        | OS, RFS           | SC           | -        | 53 (4–167)           |
| Gadducci_2010  | Italy        | R            | 140         | IB2-IIB        | CT and Surgery       | 47 (22–79)        | 272        | OS, RFS           | DE           | -        | 56 (5–188)           |
| Hernandez_2000 | USA          | R            | 291         | IIB-IVA        | Surgery and RT       | 50 (25–79)        | 400        | OS                | Rep          | Yes      | -                    |
| De Jonge_1999  | South Africa | R            | 93          | IB             | Surgery              | -                 | 400        | OS, RFS           | Rep          | Yes      | 45 (12–104)          |
| Rodriguez_1994 | USA          | R            | 219         | IB             | Surgery              | 40                | 300        | OS                | DE           | -        | -                    |
| Lopes_1994     | England      | R            | 643         | I-IV           | Surgery or RT        | 46 (20–90)        | 400        | OS                | DE           | -        | -                    |
| Hernandez_1994 | USA          | R            | 623         | IB             | Surgery              | -                 | 400        | OS, PFS           | DE           | -        | -                    |
| Hernandez_1992 | USA          | R            | 113         | I-IV           | RT                   | 59                | 400        | OS                | DE           | -        | -                    |

<sup>M</sup>Reported as mean age.

Abbreviations: R = retrospective; RT = radiotherapy; CT = chemotherapy; OS = overall survival; DFS = disease-free survival; PFS = progression-free survival; RFS = relapse-free survival; SC = survival curve; DE = data extrapolated; Rep = Reported; -, not reported.

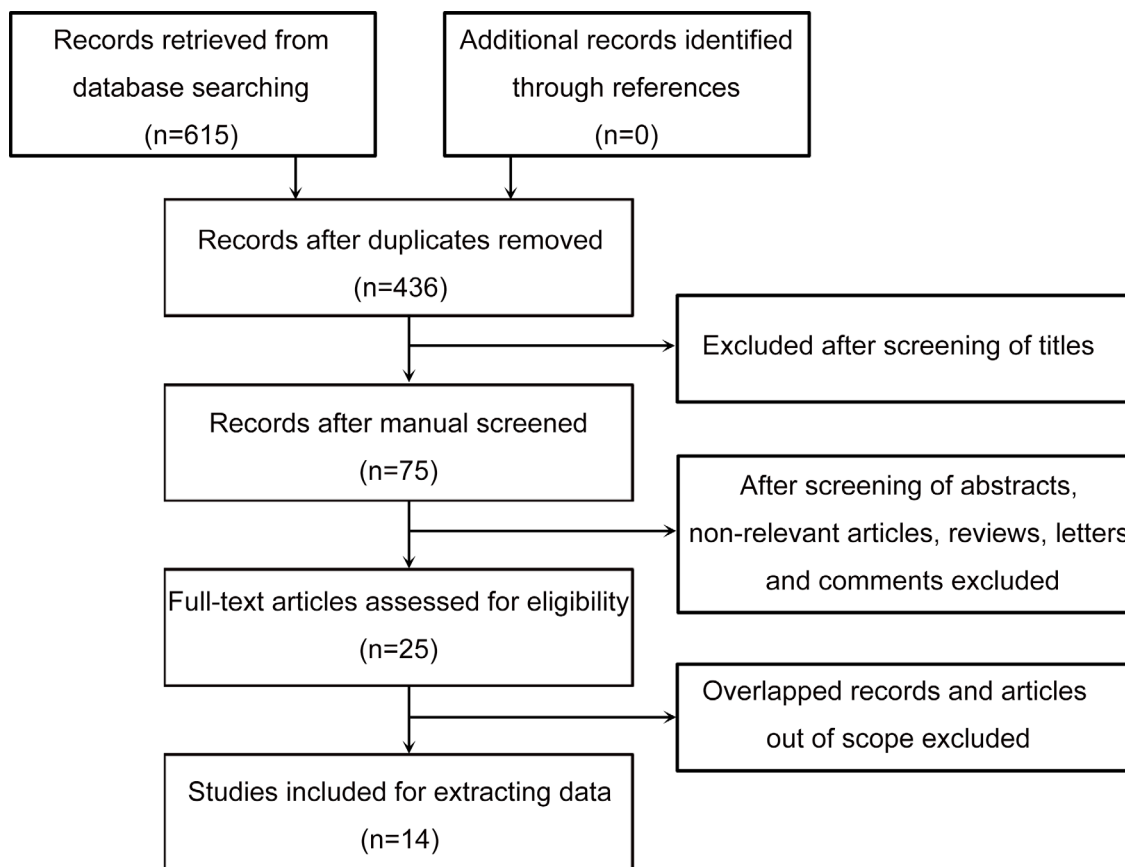

**Figure 1: Flow chart of study selection.**

**Table 2: Subgroup analysis of pooled hazard ratios for OS**

| Studies          | HR(95% CI)      | P value | Meta-regression<br>P value | Heterogeneity      |         |
|------------------|-----------------|---------|----------------------------|--------------------|---------|
|                  |                 |         |                            | I <sup>2</sup> (%) | P value |
| Publication year |                 |         | 0.378                      |                    |         |
| 1992–2000        | 1.80(1.45–2.23) | < 0.001 |                            | 22.3               | 0.266   |
| 2010–2015        | 1.51(1.19–1.91) | 0.001   |                            | 27.5               | 0.219   |
| Population       |                 |         | 0.518                      |                    |         |
| Asia             | 1.48(1.14–1.92) | 0.004   |                            | 37.1               | 0.174   |
| Europe           | 1.67(1.21–2.32) | 0.002   |                            | 0                  | 0.403   |
| Americas         | 1.81(1.40–2.34) | < 0.001 |                            | 42.8               | 0.155   |
| No. of patients  |                 |         | 0.732                      |                    |         |
| > 150            | 1.64(1.37–1.95) | < 0.001 |                            | 0                  | 0.758   |
| ≤ 150            | 1.89(0.91–3.92) | 0.087   |                            | 65.3               | 0.021   |
| Cut-off          |                 |         | 0.704                      |                    |         |
| > 300            | 1.72(1.40–2.10) | < 0.001 |                            | 0                  | 0.468   |
| ≤ 300            | 1.60(1.08–2.36) | 0.020   |                            | 50.2               | 0.074   |
| Source of HR     |                 |         | 0.891                      |                    |         |
| univariable      | 1.68(1.38–2.04) | < 0.001 |                            | 37.7               | 0.107   |
| multivariable    | 1.63(1.24–2.15) | 0.001   |                            | 0                  | 0.491   |

Abbreviations: OS = overall survival; HR = hazard ratio; CI = confidence interval.

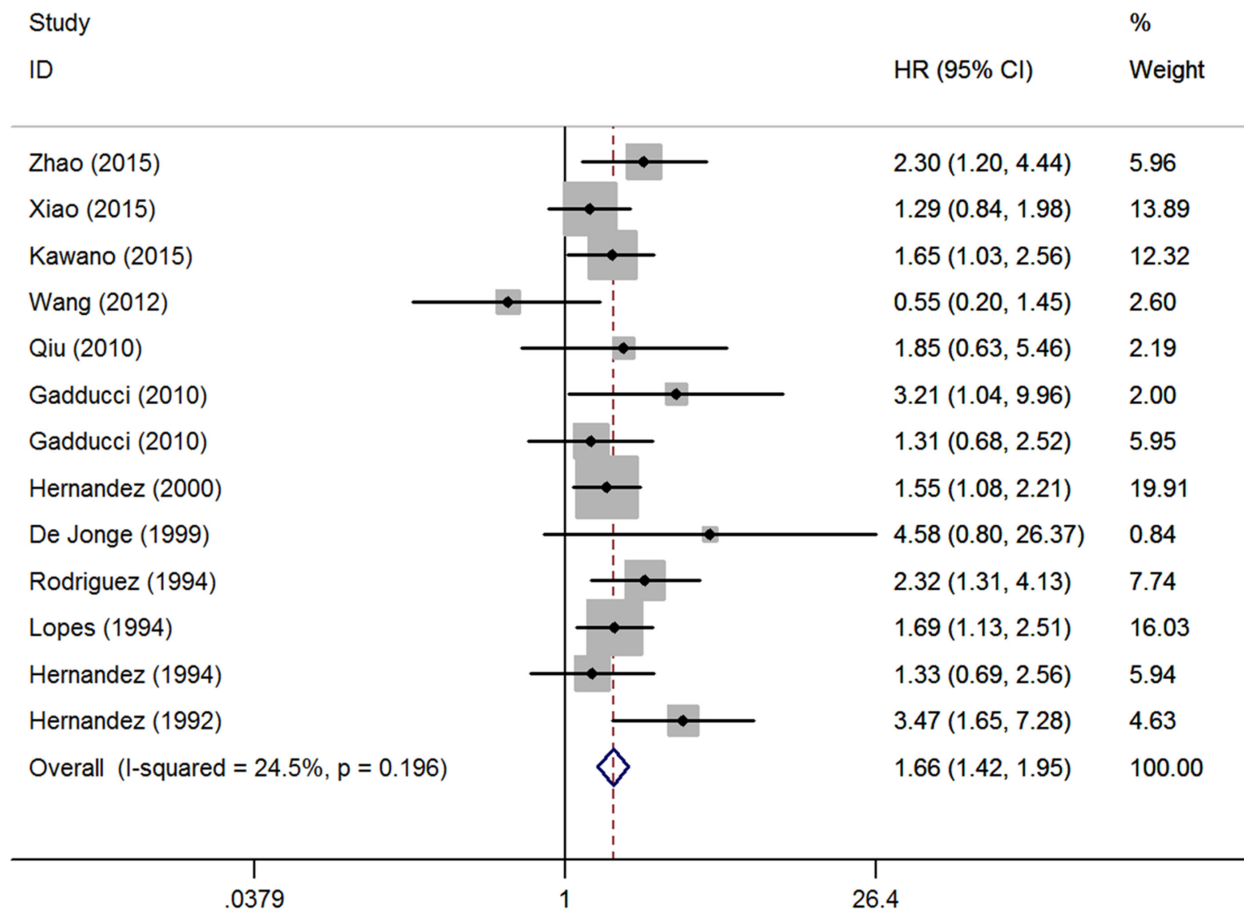

**Figure 2: Forest plot of studies evaluating the association between pretreatment thrombocytosis and overall survival.**

**Table 3: Meta-analysis of the association between thrombocytosis and clinicopathological features of cervical cancer**

| Variables          | Studies | Patients | Pooled OR | 95% CI    | P value | Heterogeneity I <sup>2</sup> (%) | P value |
|--------------------|---------|----------|-----------|-----------|---------|----------------------------------|---------|
| Clinical stage     | 3       | 1015     | 2.39      | 1.68–3.38 | < 0.001 | 33.3                             | 0.224   |
| Pelvic node status | 6       | 1958     | 1.58      | 1.01–2.45 | 0.044   | 51.9                             | 0.065   |
| Tumor size         | 2       | 460      | 2.32      | 1.39–3.87 | 0.001   | 0                                | 0.886   |
| Histology          | 4       | 1170     | 0.78      | 0.28–2.22 | 0.646   | 78.9                             | 0.003   |

Abbreviations: OR = odds ratio; CI = confidence interval.

## DISCUSSION

The correlation between increased platelet counts and malignancy was initially reported by Levin and Conley in 1964 [21]. In patients with malignancy, particularly cases with advanced-stage tumor, tumor-related thrombocytosis occurs in 4% to 55% of them either at time of diagnosis or during the process of the disease [22]. Then, platelet count has been found as a prognosis predictor for various types of cancer [23, 24]. The thrombocytosis, reflecting the systemic inflammatory response, has been described to be correlated with adverse oncologic outcome of cervical cancer patients. Nevertheless, some studies have yielded inconsistent results. So this circumstance indicates a necessity for a systematic review and meta-analysis of the present literatures.

In the present study, the results indicated that pretreatment thrombocytosis predicts poor oncologic outcome for patients with cervical cancer, which is accordance with a previous study [6]. The results

presented that patients with pretreatment thrombocytosis in cervical cancer are prone to suffer a poor OS and RFS. Nevertheless, the impact of thrombocytosis on PFS of cervical cancer patients was negligible for lacking of statistical significance. We think there are many reasons and factors causing the discordance between OS/RFS and PFS results. As we know, the outcome PFS mostly applied in high stage tumor patients. Patients have different stage tumor may have different pathophysiologic features. Moreover, the endpoints of the three outcomes are different. The mechanism of progression is different from recurrence.

Our findings also identified that cervical cancer patients with pretreatment elevated platelet count are prone to suffer a higher clinical stage, positive pelvic node metastasis and a larger tumor size, which are indicative of poor prognosis and disease aggressiveness. So platelet count is a solid prognostic factor in cervical cancer. As platelet count measurement is available and well standardized for every clinical institution, it may

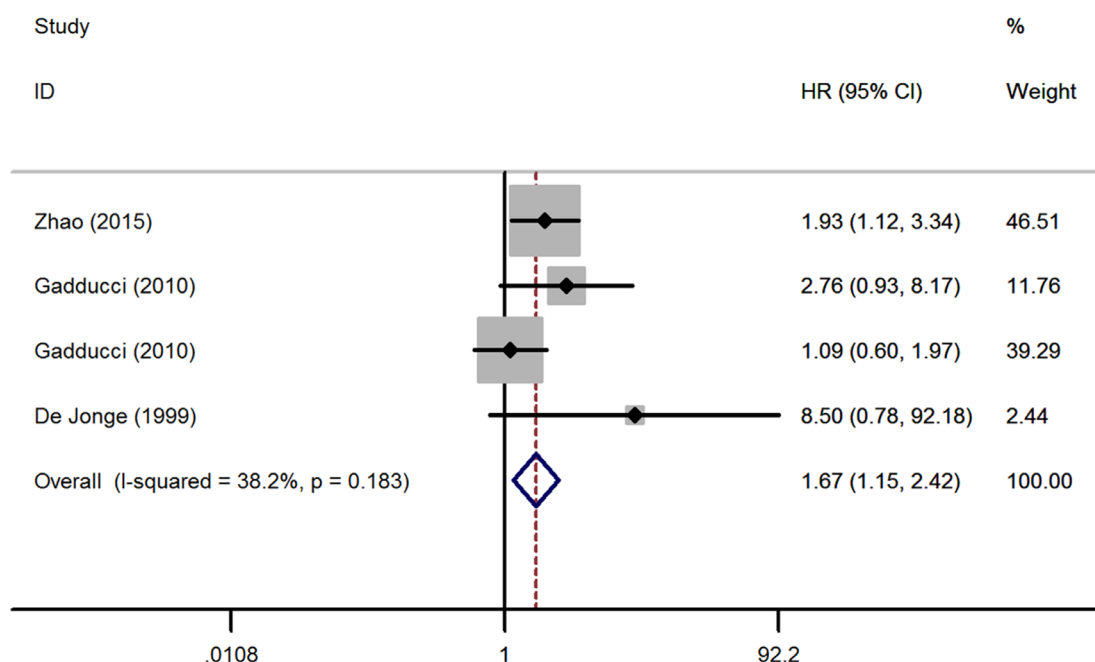

**Figure 3: Forest plot of studies evaluating the association between pretreatment thrombocytosis and recurrence-free survival.**

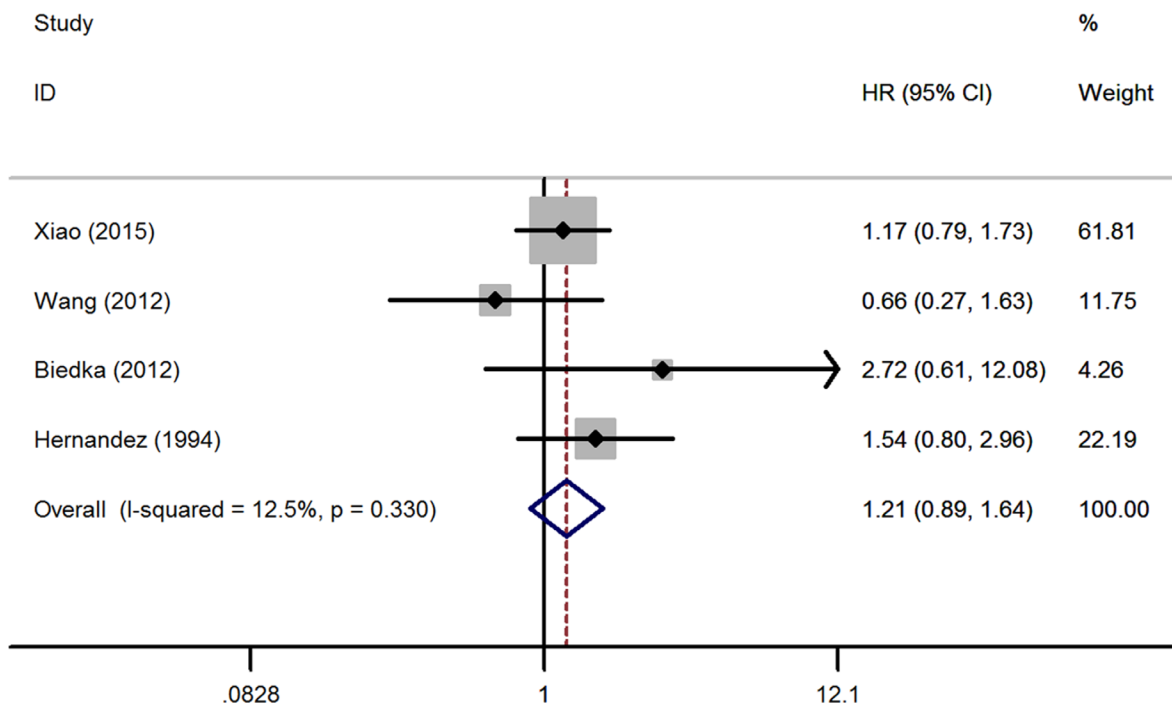

**Figure 4: Forest plot of studies evaluating the association between pretreatment thrombocytosis and progression-free survival.**

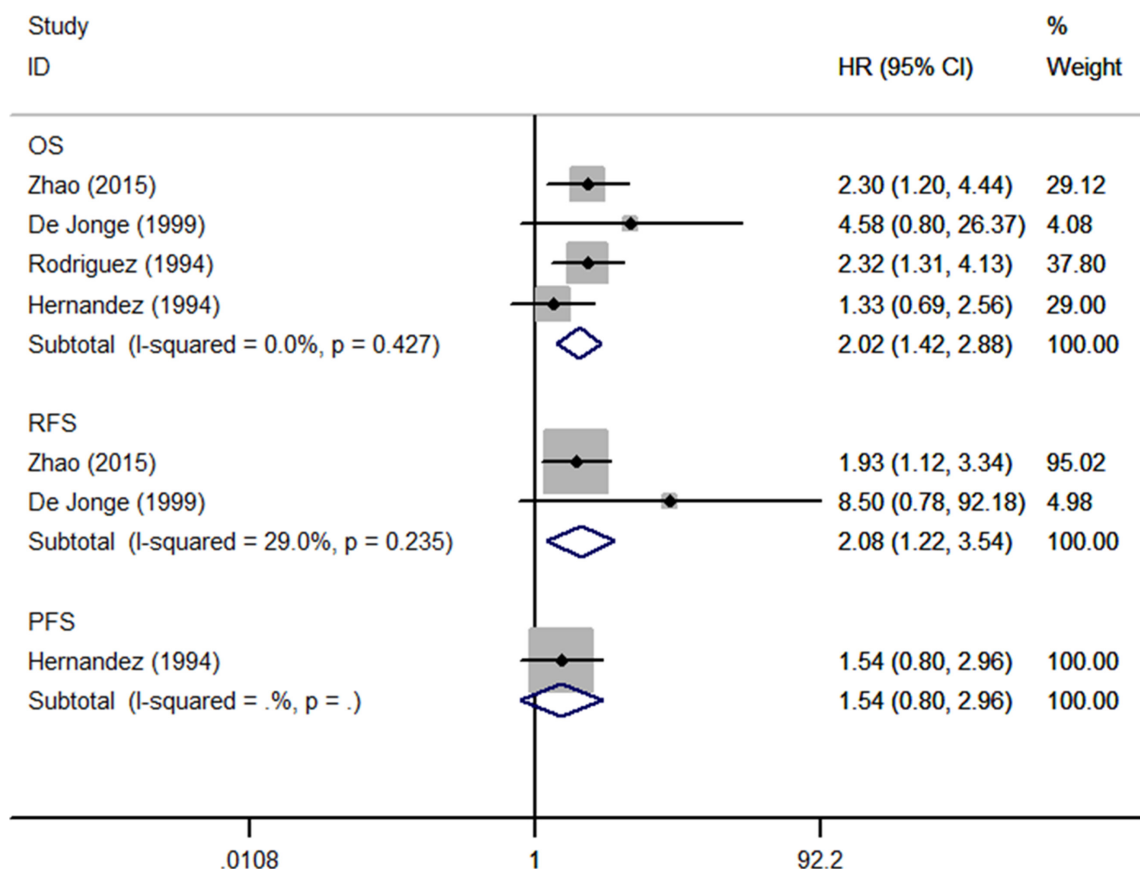

**Figure 5: Forest plot of studies evaluated the prognostic role of pretreatment thrombocytosis in low stage patients treated with surgery alone.**

be used as a convenient and useful serum biomarker in supplying conventional clinicopathological variables to help clinicians to estimate patient outcome.

Our study has several advantages. First, we perform the study stringently and followed the guidelines of PRISMA, which ensured the authentic results. Second, in contrast to the previous meta-analysis [6], which was published in 2012 and embraced 5 literatures about oncologic outcomes of cervical cancer, our study included more eligible literatures to low down potential risk of bias. Third, except as OS, we also evaluated the RFS and PFS, which presented extensive evidence for the prognostic value of thrombocytosis in patients with cervical cancer. Fourth, in order to obtain more detailed results, we also performed subgroup analysis for low stage patients treated with surgery alone. As far as we know, this stands for the most comprehensive and latest review on this issue.

The reasons for the associations of elevated platelet count levels with outcome and clinicopathological features of cervical cancer as well as other solid malignancies remain uncertain. Some studies reflected that thrombocytosis was likely to be a sign of heavy tumor burden in patients, the underlying mechanism of which has been determined based on experimental evidence

from several experiments [7]. Angiogenesis is a crucial step in tumor proliferation and metastasis [25]. Serving as dynamic reservoirs of various angiogenesis-regulating factors, such as VEGF, PDGF, and FGF, platelets may be conducive to tumor vascular growth [25]. Furthermore, platelet receptors and ligands can regulate tumor cell-platelet binding to modify the biological behavior of the malignance [26]. Buergy et al. [27] suggested that various growth factors and cytokines, including granulocyte-macrophage colony-stimulating factor, leukemia inhibitory factor, interleukin 1, interleukin 3, interleukin 6 (IL-6), interleukin 11, and thrombopoietin can increase the process of thrombopoiesis. A recent published study of ovarian cancer proposed that thrombocytosis might be a paraneoplastic syndrome that indicates itself through tumor-derived IL-6, which activates thrombopoiesis, resulting in thrombocytosis and tumor progression [28].

Some limitations need be taken into account in the comprehension of the results of the present study. First, each meta-analysis is obviously impacted by the quality of their constituent studies, some relevant studies lacking specific data may not be included in this meta-analysis. Because of the fact studies with non-significant or null findings were potentially less likely to be published than

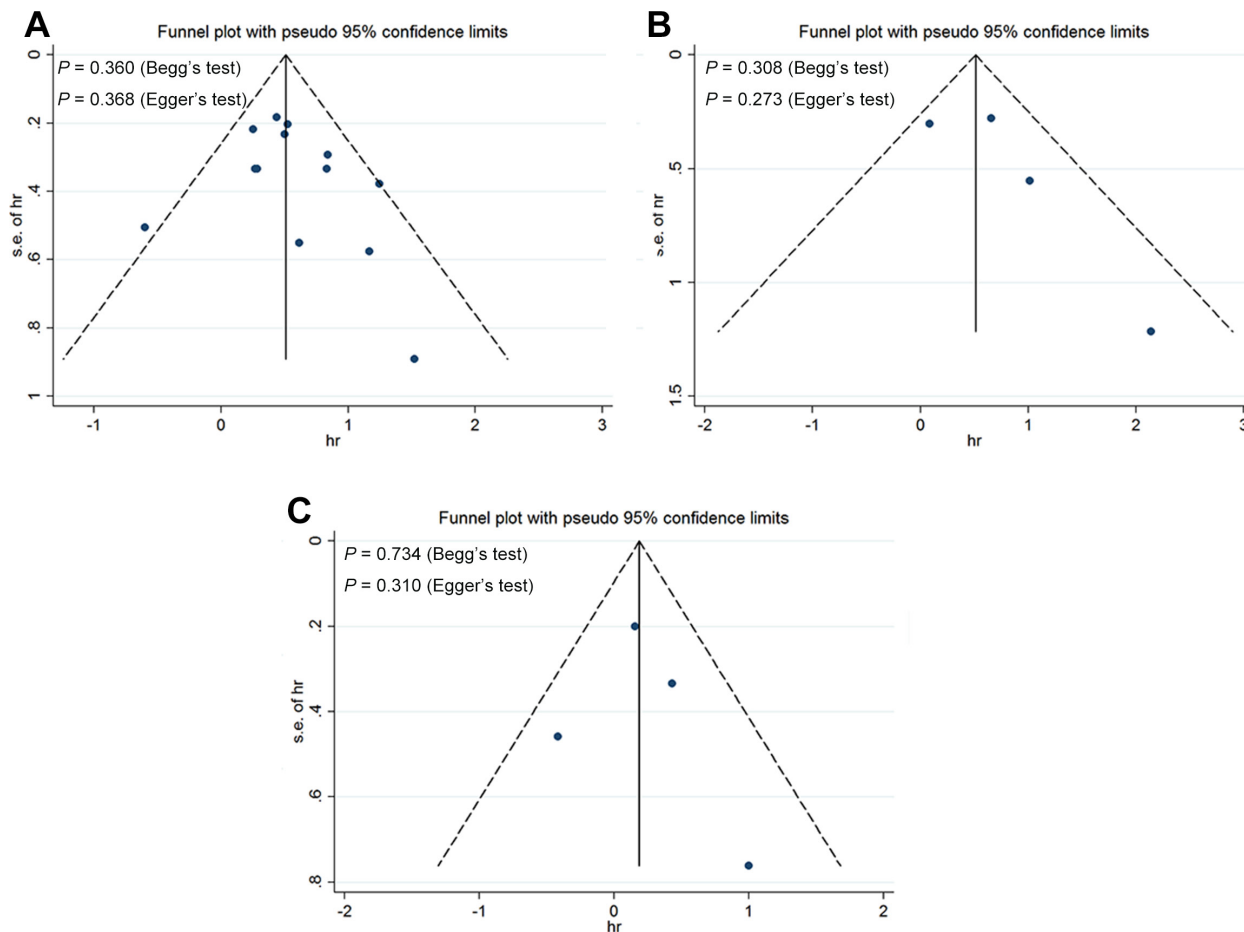

**Figure 6: Funnel plots, Begg and Egger tests result for the evaluation of potential publication bias.** Plots are arranged as follows: (A) overall survival; (B) recurrence-free survival; (C) progression-free survival.

research with statistically significant results, pooled HRs or ORs may be overestimated as a result of reporting bias. Second, obvious inter-study heterogeneity was found in some analyses (pelvic node status and histology). Several differences among the studies could have led to the heterogeneity of meta-analyses, comprising patients' baseline features (country, race, sex, age, and clinical stage and tumor size), cut-off values for platelet count, treatment strategy for patients, and length of follow-up. Because of methodologic limitations of the non-randomized studies included, the results might be affected by some potential unmeasured or residual confounders. Additionally, the method of extracting the HRs and 95% CI from included literatures was also a possible reason that could have resulted in heterogeneity. Of the 14 studies, 3 directly provided HRs, and the methods described by Tierney et al. [29] were used to calculate individual HRs of the left literatures. The calculated HRs might be not as dependable as those obtained from statistics reported directly. Third, because of limited literatures, most of meta-analyses included a few studies, which might unavoidably raise the risk of random error. Therefore, additional well-designed and appropriately conducted prospective research are needed to verify a more persuasive association between thrombocytosis and cervical cancer.

Despite the limitations described above, our comprehensive systematic review and meta-analysis reveals that pretreatment thrombocytosis is significantly associated with inferior OS and RFS in cervical cancer patients. It may be used as a readily available biomarker supplying conventional clinicopathological variables to refine clinical outcome prediction for cervical cancer patients, though large prospective studies are needed to demonstrate our findings.

## MATERIALS AND METHODS

This meta-analysis was performed in the light of the guidelines of Preferred Reporting Items for Systematic Reviews and Meta-Analyses (PRISMA) [30].

### Search strategy

A systematic literature search was conducted in June 2016 using PubMed, Embase, Web of Science databases and the Cochrane Library. The searches were not limited by language. Our search strategy included terms for: "thrombocytosis" (e.g., "thrombocytosis," "thrombocythemia," "platelet count," "platelet"), "prognosis" (e.g., "prognosis," "outcome," "survival," "mortality," "recurrence" "progression," "metastasis") and "cervical cancer" (e.g., "cervical cancer," "cervical tumor," "cervical neoplasm" "cervical carcinoma"). In addition, the references from the related literatures embracing the all retrieved studies, editorials, and reviews were manually screened.

### Study selection

Inclusion criteria for selecting the articles for our analysis were as follows: (1) retrospective or prospective study design; (2) studies of people with cervical cancer reporting on the prognostic impact of the peripheral blood platelet count; (3) treatment limited to surveillance, surgery, radiotherapy, or chemotherapy; (4) measurement of platelet count before specific treatments; (5) clearly described outcome evaluation containing overall survival (OS), recurrence-free survival (RFS) or progression-free survival (PFS); (6) oncologic outcome was further investigated regarding hazard ratio (HR) with confidence interval (CI), HR with *P* value, Kaplan-Meier curves or the needed data for calculating HR and CI; and (7) median follow-up longer than 6 months.

Exclusion criteria were as follows: (1) non-human research; (2) were editorials, letters, case reports, expert opinions, reviews, meeting records; (3) post-treatment platelet count; (4) didn't analyzed platelet count as a dichotomized variable; or (5) lacked competent data for calculating HRs and their 95% CIs. When more than one studies analyzing the same patient cohort were retrieved, we selected the more well-designed, recent and informative publication. Two individual researchers (J.C and Z.Z) independently assessed eligibility of the retrieved articles. The disagreements were resolved through discussion.

### Data extraction and synthesis

OS was the primary outcome of interest. RFS and PFS were secondary outcomes. OS was deemed to the period between initiation of treatment and all-causes death or censored. RFS was calculated as time between initiation of treatment and the date of recurrence or censored. PFS was deemed to time between initiation of treatment and the date of progression or censored. Data were extracted independently by two investigators (J.C and Z.Z), who used a predefined sheet to regain information from all studies that certified for final inclusion. We designed data sheets according to former literatures concerning similar topic and PRISMA guideline [24, 30]. The following information were extracted: (1) publication information: first author's last name, publication year and design of study; (2) patients' characteristics: population study, number of patients, clinical stage of cancer, treatment pattern, median age of patients; (3) cut-off value; and (4) HR and 95% CI for OS, RFS or PFS as applicable. If available, HRs with their 95% CIs were extracted preferentially from multivariable analyses. If not, HRs and their 95% CIs from univariate analyses were extracted. If only Kaplan-Meier curves were available, we extracted data from the graphical survival plots and estimated the HRs and 95% CIs. Or HRs and 95% CIs were calculated using the data of observed events, the data of samples in



each group or the data provided by the authors. All the calculations mentioned above were based on the methods described by Tierney et al. [29].

The relationships between thrombocytosis and the clinicopathological features of cervical cancer patients were also studied. We dichotomized data about clinical stage (III/IV versus I/II), pelvic node status (positive versus negative), tumor size ( $> 4$  versus  $\leq 4$ ), and histology (SCC (squamous cell carcinoma) versus non-SCC). Original data were extracted from included studies to calculate the odds ratio (OR) and corresponding 95% CI.

## Statistical analysis

Cochran's *Q* test and Higgins *I*-squared statistic were used to identify heterogeneity of combined HRs and ORs. A *P* value  $< 0.1$  was considered significant. *I*<sup>2</sup> more than 50% is considered as a measure of severe heterogeneity. When heterogeneity was obvious, a random-effect model was applied. If not, we applied a fixed-effect model. An observed HR or OR  $> 1$  indicated inferior oncologic outcome for patients with thrombocytosis or a significant association between thrombocytosis and patients features. We used funnel plot visual inspection, Begg (rank correlation analysis) and Egger tests (linear regression analysis) to assess publication bias. Sensitivity analysis was also conducted by deletion of each single study to assess stability of the results. Subgroup analysis and meta-regression were performed for OS. All analyses were conducted with Stata 12.0 software (StatCorp, College Station, TX, USA). All statistical tests were two-sided, and statistical significance was deemed to *P* less than 0.05.

## CONFLICTS OF INTEREST

The authors declare no conflicts of interest.

## REFERENCES

1. Jemal A, Bray F, Center MM, Ferlay J, Ward E, Forman D. Global cancer statistics. *CA Cancer J Clin.* 2011; 61:69–90.
2. Tian J. Sexual well-being of cervical cancer survivors under 50 years old and the factors affecting their libido. *Gynecol Obstet Invest.* 2013; 76:177–181.
3. Kim HS, Yoon G, Ryu JY, Cho YJ, Choi JJ, Lee YY, Kim TJ, Choi CH, Song SY, Kim BG, Bae DS, Lee JW. Sphingosine kinase 1 is a reliable prognostic factor and a novel therapeutic target for uterine cervical cancer. *Oncotarget.* 2015; 6:26746–26756. doi: 10.18632/oncotarget.4818.
4. Gadducci A, Tana R, Cosio S, Genazzani AR. The serum assay of tumour markers in the prognostic evaluation, treatment monitoring and follow-up of patients with cervical cancer: a review of the literature. *Crit Rev Oncol Hematol.* 2008; 66:10–20.
5. Roxburgh CS, McMillan DC. Role of systemic inflammatory response in predicting survival in patients with primary operable cancer. *Future Oncol.* 2010; 6:149–163.
6. Yu M, Liu L, Zhang BL, Chen Q, Ma XL, Wu YK, Liang CS, Niu ZM, Qin X, Niu T. Pretreatment thrombocytosis as a prognostic factor in women with gynecologic malignancies: a meta-analysis. *Asian Pac J Cancer Prev.* 2012; 13:6077–6081.
7. Zhao K, Deng H, Qin Y, Liao W, Liang W. Prognostic significance of pretreatment plasma fibrinogen and platelet levels in patients with early-stage cervical cancer. *Gynecol Obstet Invest.* 2015; 79:25–33.
8. Xiao Y, Ren YK, Cheng HJ, Wang L, Luo SX. Modified Glasgow prognostic score is an independent prognostic factor in patients with cervical cancer undergoing chemoradiotherapy. *Int J Clin Exp Pathol.* 2015; 8:5273–5281.
9. Kawano M, Mabuchi S, Matsumoto Y, Sasano T, Takahashi R, Kuroda H, Kozasa K, Isohashi F, Ogawa K, Kimura T. Prognostic Significance of Pretreatment Thrombocytosis in Cervical Cancer Patients Treated With Definitive Radiotherapy. *Int J Gynecol Cancer.* 2015.
10. Wang D, Wu M, Ren T, Wan XR, Feng FZ, Huang HF, Yang JX, Shen K, Xiang Y. Effects of pre-chemotherapy hemoglobin and platelet levels in patients with stage Ib2-IIb cervical cancer treated with neoadjuvant chemotherapy followed by radical hysterectomy. [Article in Chinese] *Zhonghua Fu Chan Ke Za Zhi.* 2012; 47:577–581.
11. Qiu MZ, Xu RH, Ruan DY, Li ZH, Luo HY, Teng KY, Wang ZQ, Li YH, Jiang WQ. Incidence of anemia, leukocytosis, and thrombocytosis in patients with solid tumors in China. *Tumour Biol.* 2010; 31:633–641.
12. Gadducci A, Teti G, Barsotti C, Tana R, Fanucchi A, Orlandini C, Fabrini MG, Genazzani AR. Clinicopathological variables predictive of clinical outcome in patients with FIGO stage Ib2-IIb cervical cancer treated with cisplatin-based neoadjuvant chemotherapy followed by radical hysterectomy. *Anticancer Res.* 2010; 30:201–208.
13. Gadducci A, Cosio S, Zola P, Tisi G, Ferrero A, Piovano E, Cristofani R, Greco C, Sartori E. Pretreatment platelet and hemoglobin levels are neither predictive nor prognostic variables for patients with locally advanced cervical cancer treated with neoadjuvant chemotherapy and radical hysterectomy: a retrospective Italian study. *Int J Gynecol Cancer.* 2010; 20:1399–1404.
14. Hernandez E, Donohue KA, Anderson LL, Heller PB, Stehman FB. The significance of thrombocytosis in patients with locally advanced cervical carcinoma: a Gynecologic Oncology Group study. *Gynecol Oncol.* 2000; 78:137–142.
15. De Jonge ET, Viljoen E, Lindeque BG, Amant F, Nesland JM, Holm R. The prognostic significance of p53, mdm2, c-erbB-2, cathepsin D, and thrombocytosis in stage IB cervical cancer treated by primary radical hysterectomy. *Int J Gynecol Cancer.* 1999; 9:198–205.
16. Rodriguez GC, Clarke-Pearson DL, Soper JT, Berchuck A, Synan I, Dodge RK. The negative prognostic implications

- of thrombocytosis in women with stage IB cervical cancer. *Obstet Gynecol.* 1994; 83:445–448.
17. Lopes A, Daras V, Cross PA, Robertson G, Beynon G, Monaghan JM. Thrombocytosis as a prognostic factor in women with cervical cancer. *Cancer.* 1994; 74:90–92.
  18. Hernandez E, Heller PB, Whitney C, Diana K, Delgado G. Thrombocytosis in surgically treated stage IB squamous cell cervical carcinoma (A Gynecologic Oncology Group study). *Gynecol Oncol.* 1994; 55(3 Pt 1):328–332.
  19. Hernandez E, Lavine M, Dunton CJ, Gracely E, Parker J. Poor prognosis associated with thrombocytosis in patients with cervical cancer. *Cancer.* 1992; 69:2975–2977.
  20. Biedka M, Makarewicz R, Kopczynska E, Marszalek A, Goralewska A, Kardymowicz H. Angiogenesis and lymphangiogenesis as prognostic factors after therapy in patients with cervical cancer. *Contemp Oncol (Pozn).* 2012; 16:6–11.
  21. Levin J, Conley CL. Thrombocytosis associated with malignant disease. *Arch Intern Med.* 1964; 114:497–500.
  22. Lin RJ, Afshar-Kharghan V, Schafer AI. Paraneoplastic thrombocytosis: the secrets of tumor self-promotion. *Blood.* 2014; 124:184–187.
  23. Crumley AB, McMillan DC, McKernan M, McDonald AC, Stuart RC. Evaluation of an inflammation-based prognostic score in patients with inoperable gastro-oesophageal cancer. *Br J Cancer.* 2006; 94:637–641.
  24. Gu L, Li H, Gao Y, Ma X, Chen L, Li X, Zhang Y, Fan Y, Zhang X. The association of platelet count with clinicopathological significance and prognosis in renal cell carcinoma: a systematic review and meta-analysis. *PLoS One.* 2015; 10:e0125538.
  25. Jain S, Harris J, Ware J. Platelets: linking hemostasis and cancer. *Arterioscler Thromb Vasc Biol.* 2010; 30:2362–2367.
  26. Bambace NM, Holmes CE. The platelet contribution to cancer progression. *J Thromb Haemost.* 2011; 9:237–249.
  27. Buergy D, Wenz F, Groden C, Brockmann MA. Tumor-platelet interaction in solid tumors. *Int J Cancer.* 2012; 130:2747–2760.
  28. Stone RL, Nick AM, McNeish IA, Balkwill F, Han HD, Bottsford-Miller J, Rupairmoole R, Armaiz-Pena GN, Pecot CV, Coward J, Deavers MT, Vasquez HG, Urbauer D, et al. Paraneoplastic thrombocytosis in ovarian cancer. *N Engl J Med.* 2012; 366:610–618.
  29. Tierney JF, Stewart LA, Ghersi D, Burdett S, Sydes MR. Practical methods for incorporating summary time-to-event data into meta-analysis. *Trials.* 2007; 8:16.
  30. Moher D, Liberati A, Tetzlaff J, Altman DG, Group P. Preferred reporting items for systematic reviews and meta-analyses: the PRISMA statement. *BMJ.* 2009; 339:b2535.
